# Supplementary material
Source: publisher figshare collection journal article supplement (https://gsajournals.figshare.com/articles/dataset/_/8038940)
Supplement: Supplementary file 1 [file 1]

- Targeted - No Phenotype
- Targeted - A RNAi construct targeting this enzyme induced a phenotype

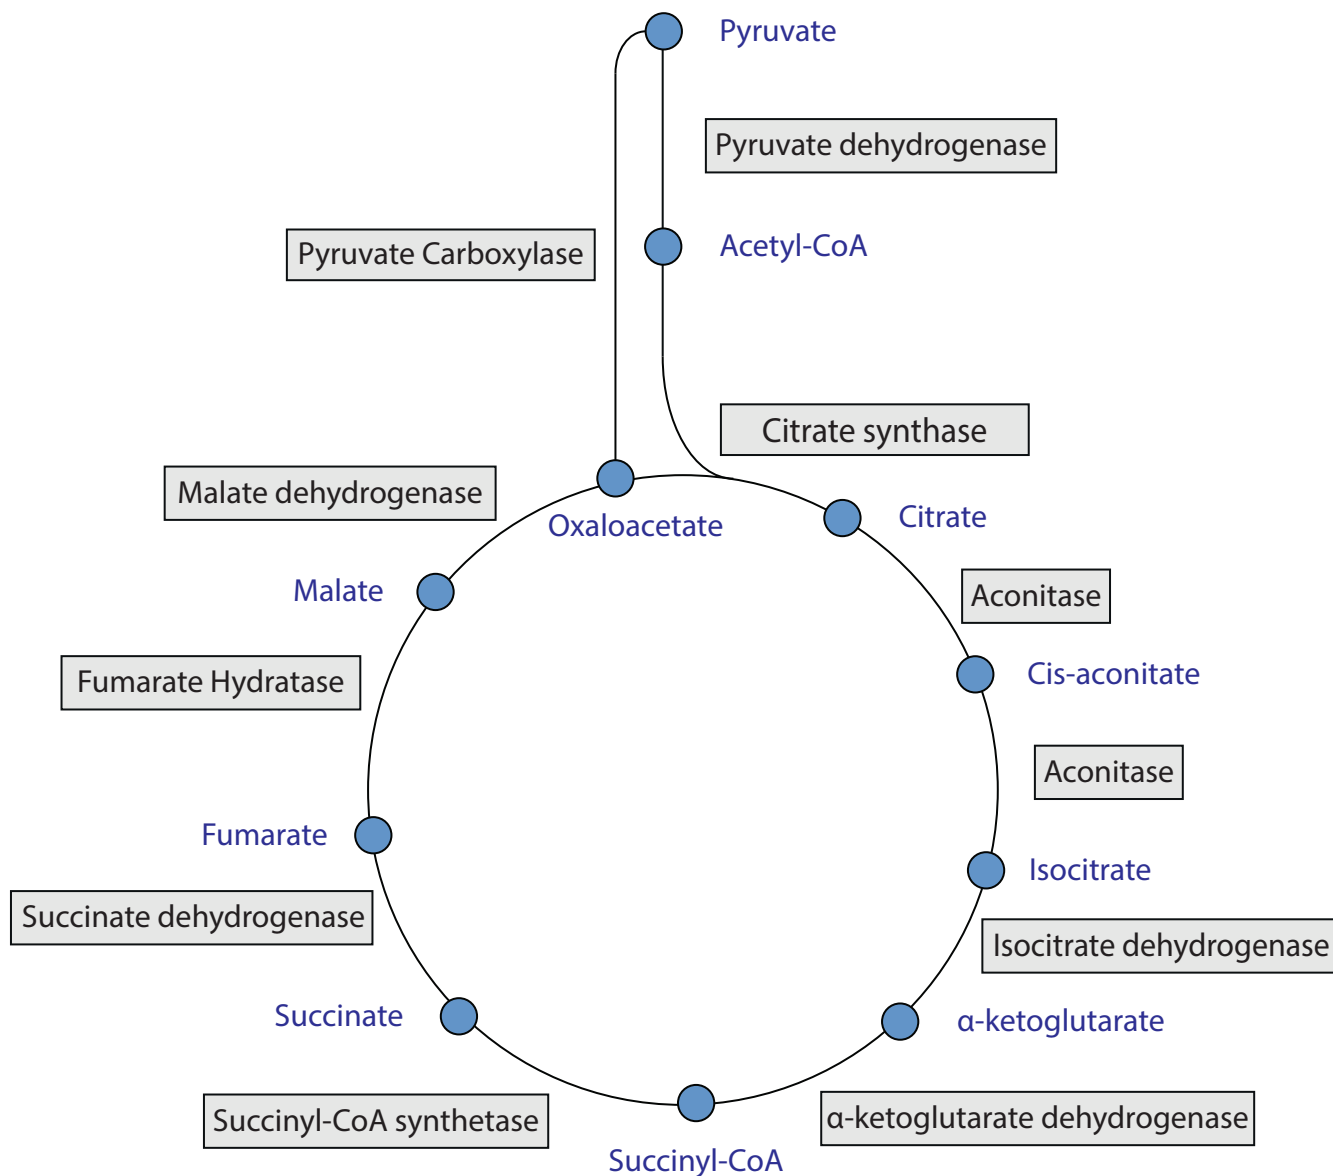

**Figure S2. TRiP RNAi lines targeting the TCA cycle do not disrupt eye development.** Grey-shaded boxes indicate that none of the RNAi transgenes targeting this enzyme induced a phenotype. Corresponding data can be found in Table S7. Diagram is a modified from the pathway illustrating KEGG pathway dme00020.
