# Supplementary material
Source: publisher figshare collection journal article supplement (https://gsajournals.figshare.com/articles/dataset/_/8038940)
Supplement: Supplementary file 2 [file 1]

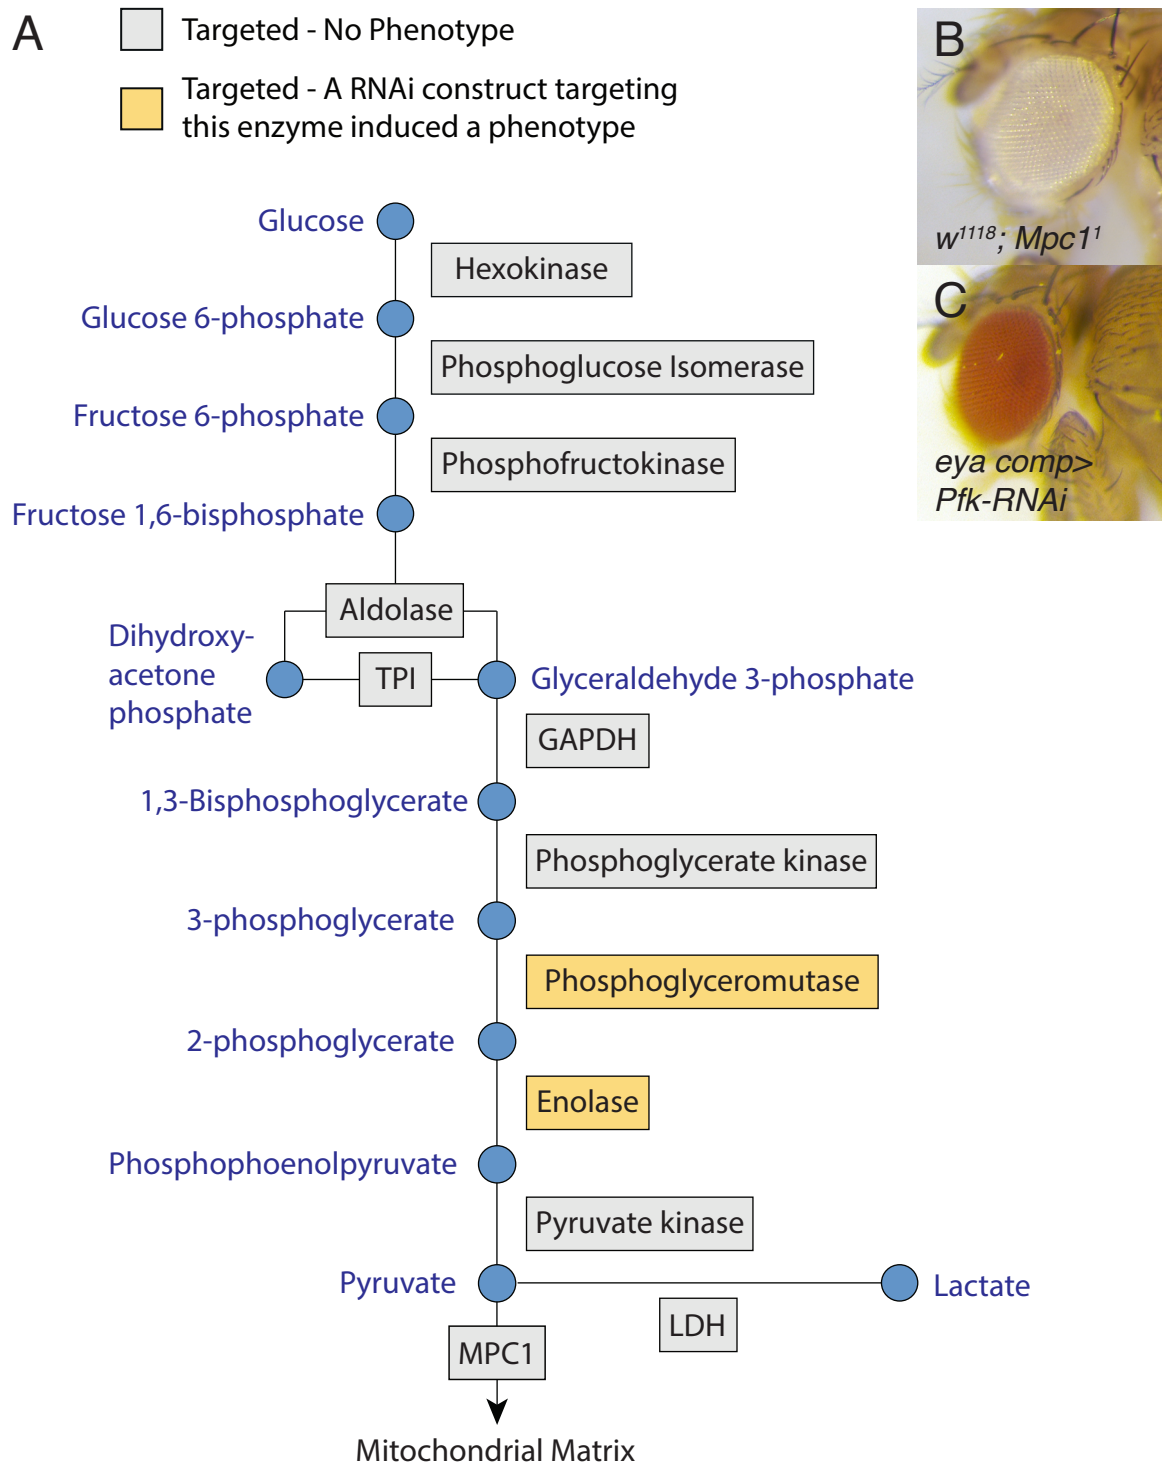

**Figure S1. Most TRiP RNAi lines that target glycolysis do not disrupt eye development.** (A) All enzymatic steps in glycolysis were targeted during the course of the screen. Yellow-shaded boxes indicate that at least one RNAi transgene targeting the enzyme induced a phenotype. Grey-shaded boxes indicate that none of the RNAi transgenes targeting this subunit induced a phenotype. Corresponding data can be found in Table S6. Diagram is modified from the pathway illustrating KEGG pathway dme00010. (B) *w<sup>1118</sup>; Mpc1<sup>1</sup>* mutant eyes are morphologically normal, indicating that glucose oxidation is not required during eye development. (C) RNAi targeting *Pfk* using BDSC 34366 failed to induce an eye phenotype. *eya composite-GAL4* is abbreviated *eya comp*.
